# Supplementary material for: A tricolor-switchable stimuli-responsive luminescent binuclear Cu(i) complex with switchable NH⋯O interactions
Source: Royal Society of Chemistry journal article supplement (doi:10.1039/d2qi00359g), 2022-01-01
Supplement: d2qi00359g1.pdf [file d2qi00359g1.pdf]

# Electronic Supplementary Information (ESI)

## A tricolor-switchable stimuli-responsive luminescent binuclear Cu(I) complex with switchable NH $\cdots$ O interactions

Peng Ju,<sup>‡a</sup> Qin Huang,<sup>‡a</sup> Rui Zhang,<sup>a</sup> Jing-Lin Chen,<sup>\*a,c</sup> Feng Zhao,<sup>\*b</sup> Sui-Jun Liu,<sup>a</sup> and He-Rui  
Wen<sup>a</sup>

<sup>a</sup> Jiangxi Provincial Key Laboratory of Functional Molecular Materials Chemistry, Department of Materials, Metallurgy and Chemistry, Jiangxi University of Science and Technology, Ganzhou 341000, People's Republic of China

<sup>b</sup> School of Chemistry and Chemical Engineering, Jiangxi Science and Technology Normal University, Nanchang 330013, People's Republic of China

<sup>c</sup> State Key Laboratory of Structural Chemistry, Fujian Institute of Research on the Structure of Matter, Chinese Academy of Sciences, Fuzhou 350002, People's Republic of China

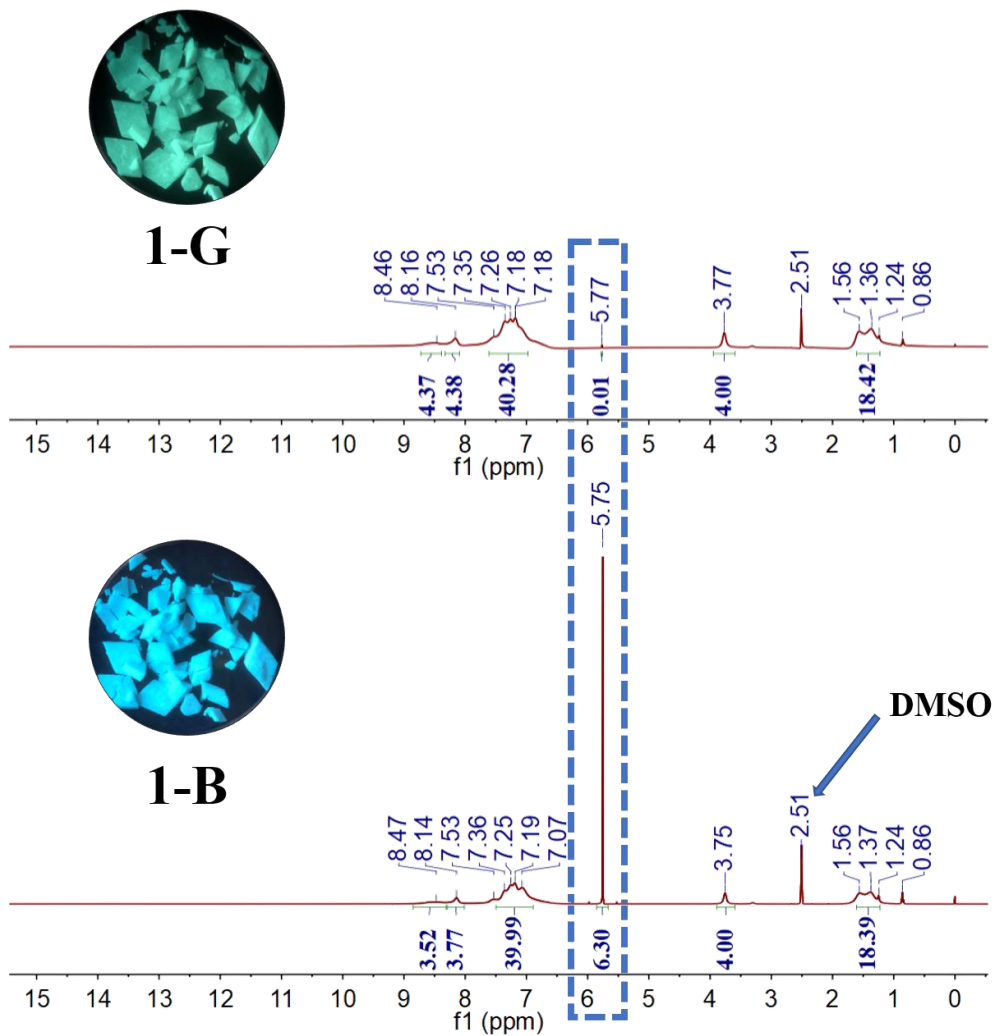

Fig. S1  $^1\text{H}$  NMR spectra of **1-B** and **1-G** in  $\text{DMSO-}d_6$ .

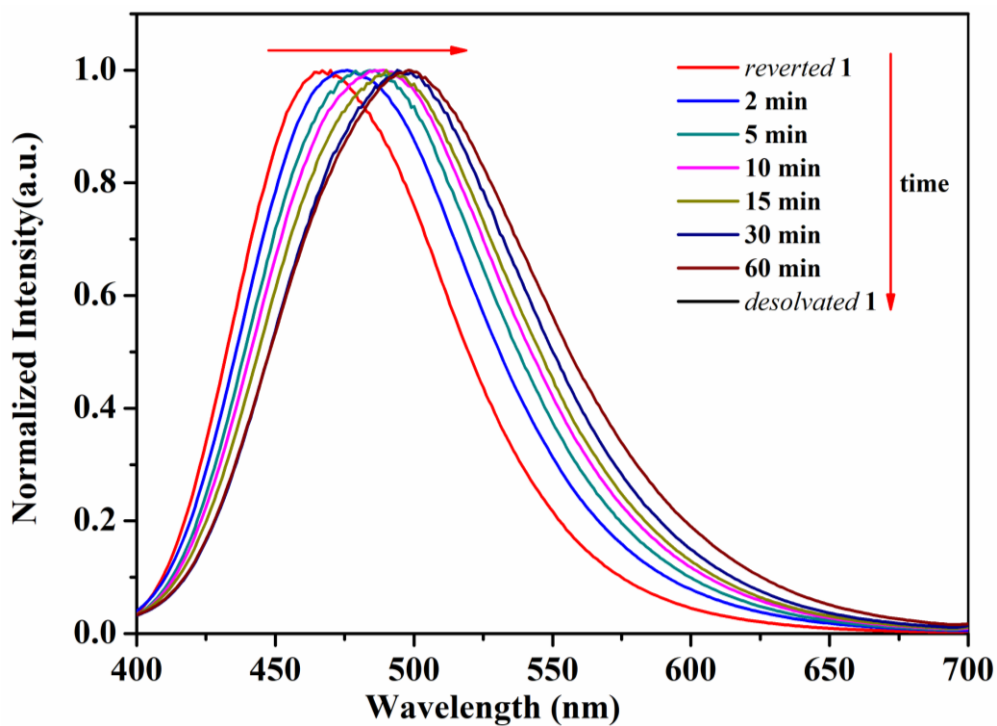

Fig. S2 Solid-state emission spectra of *reverted 1* upon exposure to air.

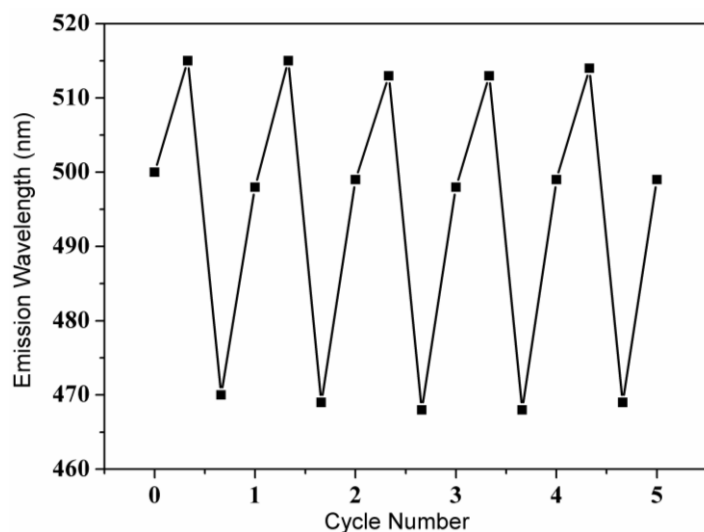

**Fig. S3** Emission maximum variation of **1-B** under alternate treatment of grinding,  $\text{CH}_2\text{Cl}_2$  vapor fuming, and exposure to air.

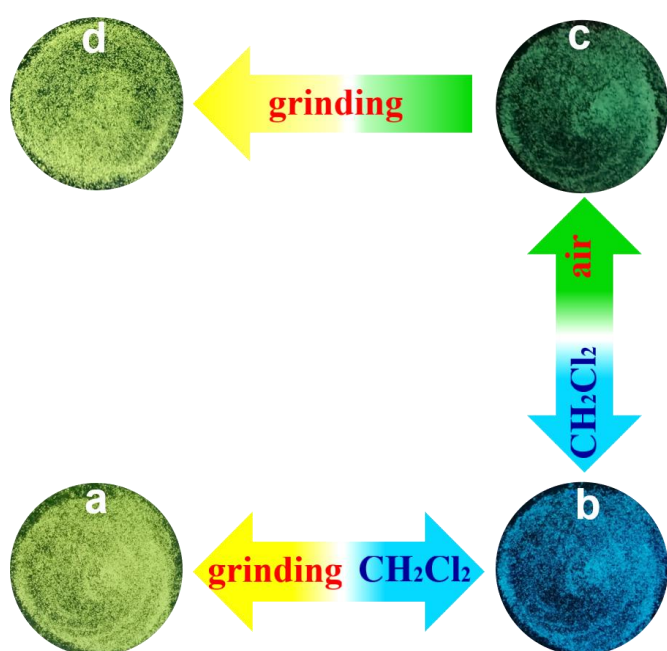

**Fig. S4** Photographic images of **1-G** (5 wt %) doped in PMMA in various solid states.

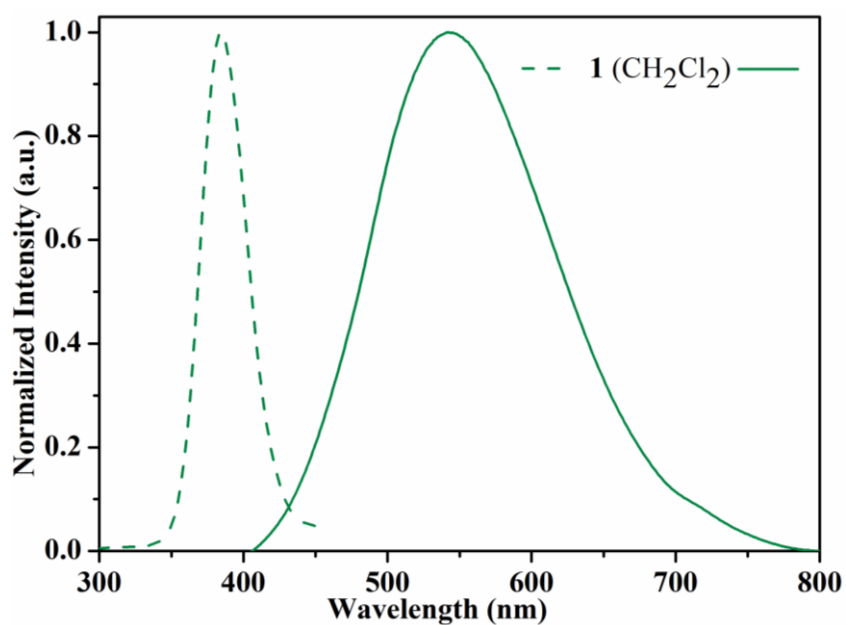

**Fig. S5** Excitation (dotted line) and emission (solid line) spectra of **1** in degassed  $\text{CH}_2\text{Cl}_2$ .

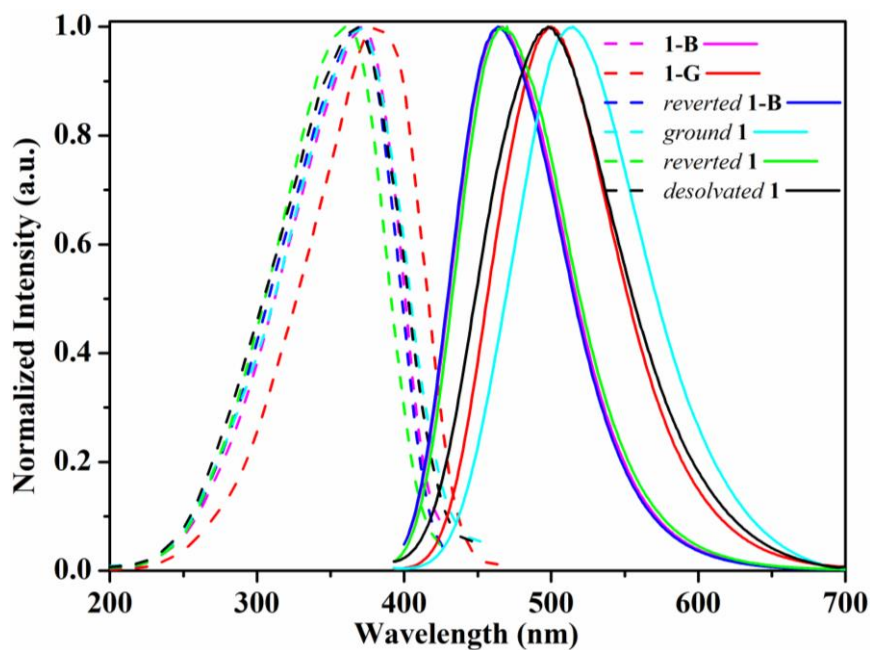

Fig. S6 Excitation (dotted lines) and emission (solid lines) spectra of **1-B** in various solid states.

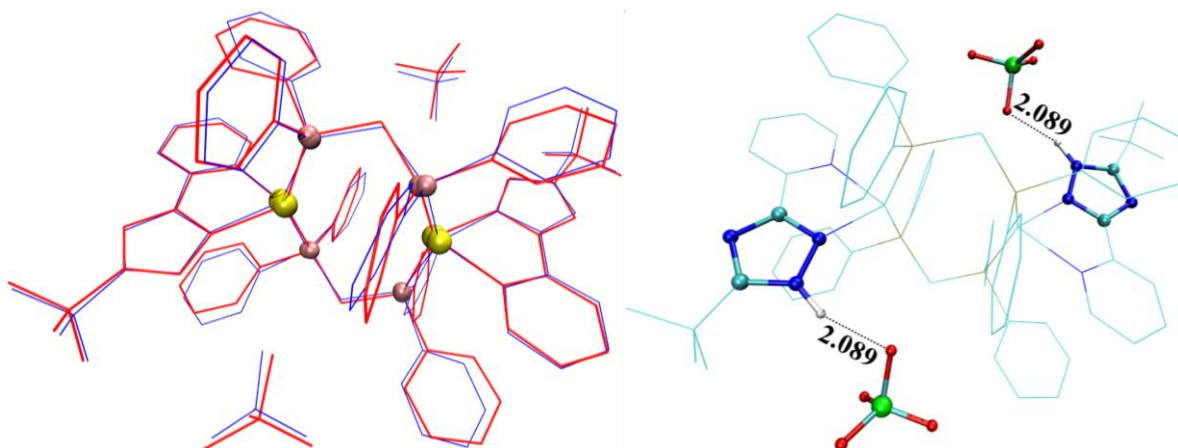

Fig. S7 Superimposition (left) of the calculated (red) and experimental (blue) structures for **1-G**. NH...O hydrogen bonds (right) in the calculated structure.

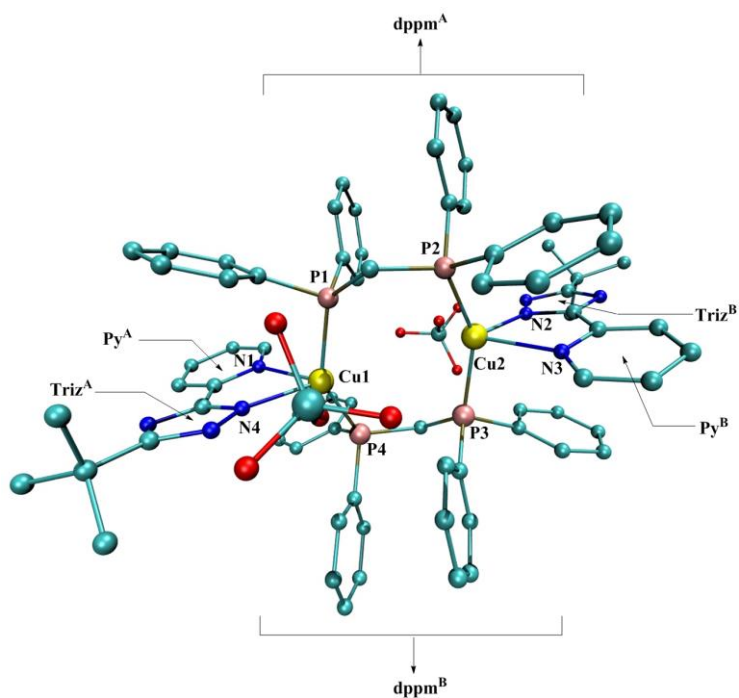

Fig. S8 Molecular fragments and atom numbering of **1-G**.

**Table S1.** Crystal data and structure refinement parameters of **1-B**

|                                             |                                 |
|---------------------------------------------|---------------------------------|
| formula                                     | $C_{75}H_{78}Cl_8Cu_2N_8O_8P_4$ |
| fw                                          | 1754.03                         |
| <i>T</i> (K)                                | 300.0                           |
| crystal system                              | Monoclinic                      |
| space group                                 | <i>C2/c</i>                     |
| <i>a</i> (Å)                                | 31.7882(16)                     |
| <i>b</i> (Å)                                | 13.2770(7)                      |
| <i>c</i> (Å)                                | 20.3615(10)                     |
| $\alpha$ (deg)                              | 90                              |
| $\beta$ (deg)                               | 102.142(2)                      |
| $\gamma$ (deg)                              | 90                              |
| <i>V</i> (Å <sup>3</sup> )                  | 8401.4(7)                       |
| <i>Z</i>                                    | 4                               |
| $\rho_{\text{calcd}}$ (g cm <sup>-3</sup> ) | 1.387                           |
| $\mu$ (mm <sup>-1</sup> )                   | 0.893                           |
| no. reflections collected                   | 62745                           |
| no. unique reflections                      | 9659                            |
| <i>R</i> <sub>int</sub>                     | 0.0493                          |
| no. observed reflections                    | 9659                            |
| no. parameters                              | 472                             |
| GOF on <i>F</i> <sup>2</sup>                | 1.077                           |
| <i>R</i> 1 [ <i>I</i> > 2σ( <i>I</i> )]     | 0.0789                          |
| <i>wR</i> 2                                 | 0.2601                          |

**Table S2.** Selected bond lengths (Å) and angles (deg) of **1-B**

|           |            |           |            |
|-----------|------------|-----------|------------|
| Cu1–N1    | 2.171(4)   | Cu1–N2    | 2.125(4)   |
| Cu1–P1    | 2.2355(12) | Cu1–P2    | 2.2566(12) |
| N1–Cu1–N2 | 77.18(15)  | N1–Cu1–P1 | 103.01(11) |
| N1–Cu1–P2 | 98.81(11)  | N2–Cu1–P1 | 114.69(11) |
| N2–Cu1–P2 | 102.64(11) | P1–Cu1–P2 | 139.93(5)  |

**Table S3.** Cartesian coordinates of the optimized S<sub>0</sub> geometries of **1-G** with B3LYP-D3/6-31G\*/SDD level in the gas phase

|    |             |             |             |
|----|-------------|-------------|-------------|
| Cu | 4.02953300  | 4.42201500  | 9.39869400  |
| P  | 5.21567000  | 4.68107700  | 7.46839900  |
| P  | 4.31074600  | 4.12245300  | 11.64647000 |
| N  | 1.74169400  | 4.10616800  | 9.26874000  |
| N  | 3.05053700  | 6.51998100  | 9.56561500  |
| C  | 7.00894600  | 4.15673900  | 7.36526600  |
| C  | 5.25522700  | 6.48065200  | 7.07512000  |
| C  | 4.50585000  | 3.95937700  | 5.93427000  |
| C  | 4.66031200  | 2.47089000  | 12.44466700 |
| C  | 5.43110800  | 5.30077700  | 12.49685400 |
| C  | 2.67083400  | 4.55122400  | 12.36946200 |
| N  | 0.74787300  | 3.18549700  | 9.25423800  |
| C  | 1.06916800  | 5.25380600  | 9.16583700  |
| C  | 1.73580800  | 6.55017900  | 9.27335900  |
| C  | 3.67213700  | 7.68198800  | 9.78945000  |
| Cl | 1.60823400  | -0.48181300 | 10.63664300 |
| O  | 2.27714400  | 0.66202800  | 9.91494600  |
| O  | 2.61812700  | -1.48920500 | 10.44406100 |
| O  | 1.36418200  | 0.00162900  | 12.01763400 |
| O  | 0.31865800  | -0.86855500 | 10.00306800 |
| C  | -0.45728500 | 3.79270600  | 9.14113400  |
| C  | 1.01552100  | 7.74379300  | 9.15786600  |
| C  | 5.38094300  | 5.43289200  | 13.89589800 |
| C  | 6.28409900  | 6.13321500  | 11.75798100 |
| C  | 2.34355500  | 5.88563500  | 12.65843800 |
| C  | 1.67890900  | 3.56781100  | 12.48078600 |
| N  | -0.27812200 | 5.10728000  | 9.07022600  |
| C  | 1.04832600  | 6.22368900  | 13.05100800 |
| C  | 3.03579500  | 8.91864400  | 9.70674800  |
| C  | 4.11559500  | 7.08229900  | 6.51245600  |
| C  | 6.32346300  | 7.29394500  | 7.46366200  |
| C  | 6.16563900  | 6.38141000  | 14.54289200 |
| C  | 7.04165700  | 7.11625700  | 12.40668300 |
| C  | 3.52518100  | 2.97149600  | 6.04454900  |
| C  | 2.96548100  | 2.38382900  | 4.91193800  |
| C  | 4.92917600  | 4.36052100  | 4.65674600  |
| C  | 1.68160100  | 8.94684700  | 9.37249800  |
| C  | 4.06333900  | 8.46547000  | 6.34803300  |
| C  | 4.37193300  | 3.77385700  | 3.52058700  |
| C  | 0.38892300  | 3.90624600  | 12.89061500 |
| C  | 6.26804600  | 8.68038500  | 7.31346300  |
| C  | 5.13511500  | 9.27023400  | 6.75324200  |
| C  | 6.98409000  | 7.23452100  | 13.79490200 |
| C  | 0.06725600  | 5.23585300  | 13.16970400 |
| C  | -1.77432600 | 3.05291900  | 9.11650400  |
| C  | 3.38702100  | 2.78653900  | 3.64476700  |

|    |             |             |             |
|----|-------------|-------------|-------------|
| C  | -2.90298200 | 4.04576600  | 8.78856900  |
| C  | -2.02299900 | 2.42629400  | 10.50880900 |
| C  | -1.72046200 | 1.94696200  | 8.03883300  |
| H  | 0.94703900  | 2.20914000  | 9.46587200  |
| H  | 4.02769100  | 1.73354500  | 11.94136400 |
| H  | 4.35445800  | 2.49468700  | 13.49532200 |
| H  | 3.09693000  | 6.66173400  | 12.57296300 |
| H  | 4.71502500  | 7.60922600  | 10.05629500 |
| H  | 4.72086900  | 4.79681300  | 14.47783400 |
| H  | 6.36539800  | 6.01925700  | 10.67990400 |
| H  | 3.22892900  | 2.62784700  | 7.02042000  |
| H  | 3.59716900  | 9.82780900  | 9.89273900  |
| H  | 3.27001400  | 6.47151500  | 6.20868800  |
| H  | 5.67953100  | 5.13972800  | 4.54993300  |
| H  | 1.89780100  | 2.53892300  | 12.23128100 |
| H  | 7.12198500  | 9.26416800  | 7.64735100  |
| H  | 7.21777700  | 6.86939400  | 7.88330100  |
| H  | 6.13325800  | 6.46117100  | 15.62569900 |
| H  | 0.80738000  | 7.26163600  | 13.26516400 |
| H  | -0.35867800 | 3.12451600  | 12.98276300 |
| H  | 3.17645700  | 8.91823100  | 5.91279900  |
| H  | 7.66205800  | 7.79449100  | 11.83267900 |
| H  | -0.94020600 | 5.50165500  | 13.47838700 |
| H  | 2.95756600  | 2.33439600  | 2.75475000  |
| H  | 7.57933100  | 7.99286000  | 14.29663800 |
| H  | 2.21985100  | 1.60511800  | 5.04626500  |
| H  | -0.04202800 | 7.69961100  | 8.92450200  |
| H  | 4.70281600  | 4.09017400  | 2.53493000  |
| H  | 5.08170100  | 10.34869000 | 6.63004000  |
| H  | 1.15000200  | 9.89061600  | 9.28956500  |
| H  | -2.95234500 | 4.84787600  | 9.53076400  |
| H  | -3.86206400 | 3.51607900  | 8.77955600  |
| H  | -2.75129700 | 4.50786800  | 7.80777600  |
| H  | -1.22770400 | 1.73243500  | 10.79664900 |
| H  | -2.96601800 | 1.86854700  | 10.49900800 |
| H  | -2.09170700 | 3.20729200  | 11.27338800 |
| H  | -1.53493500 | 2.37712300  | 7.04779400  |
| H  | -2.67854200 | 1.41662700  | 8.00785700  |
| H  | -0.94171800 | 1.20835900  | 8.24689600  |
| P  | 7.33287500  | 2.48907000  | 8.14157500  |
| H  | 7.64343700  | 4.87677100  | 7.89548900  |
| H  | 7.31715800  | 4.15410500  | 6.31438300  |
| P  | 6.44578200  | 1.94709500  | 12.31944800 |
| Cu | 7.57438600  | 2.23915800  | 10.38548900 |
| C  | 6.22190900  | 1.32290200  | 7.26810200  |
| C  | 8.99349900  | 2.04487200  | 7.47805900  |
| C  | 6.41412900  | 0.14567900  | 12.70651300 |
| C  | 7.19750400  | 2.66741100  | 13.83322100 |
| N  | 9.75640300  | 2.53065800  | 10.64004100 |

|   |             |             |             |
|---|-------------|-------------|-------------|
| N | 8.52141400  | 0.10853000  | 10.18962500 |
| C | 6.35640600  | 1.11811000  | 5.88350000  |
| C | 5.26339900  | 0.59043200  | 7.98337900  |
| C | 9.32786600  | 0.72581700  | 7.13390000  |
| C | 10.00501700 | 3.01202300  | 7.50978700  |
| C | 7.53631400  | -0.45815500 | 13.29893700 |
| C | 5.36627700  | -0.66864200 | 12.26892700 |
| C | 8.33410800  | 3.47382200  | 13.71518700 |
| C | 6.65583400  | 2.42379900  | 15.10577500 |
| N | 10.70957400 | 3.48063500  | 10.80409400 |
| C | 10.44950000 | 1.39523100  | 10.73818900 |
| C | 9.82269900  | 0.08963800  | 10.53351600 |
| C | 7.92312400  | -1.05226400 | 9.90839600  |
| H | 7.09499600  | 1.68235900  | 5.32156300  |
| C | 5.55739200  | 0.18656000  | 5.22883000  |
| H | 5.12823900  | 0.75476300  | 9.04966300  |
| C | 4.46893000  | -0.35530700 | 7.32469200  |
| H | 8.56503500  | -0.04520300 | 7.11519900  |
| C | 10.64851800 | 0.39432600  | 6.82616700  |
| H | 9.77013400  | 4.01936600  | 7.81163400  |
| C | 11.32155500 | 2.68460400  | 7.19104300  |
| H | 8.36703800  | 0.15161400  | 13.64335500 |
| C | 7.58950400  | -1.84471100 | 13.44169100 |
| C | 5.41727700  | -2.05550000 | 12.40466700 |
| H | 4.49050800  | -0.24386200 | 11.81582600 |
| H | 8.76333300  | 3.64242800  | 12.73696200 |
| C | 8.90824500  | 4.05767600  | 14.84626400 |
| H | 5.79220900  | 1.77279700  | 15.21646800 |
| C | 7.22972500  | 3.00463000  | 16.23480600 |
| H | 10.47285700 | 4.46491800  | 10.65179200 |
| C | 11.91910100 | 2.89449200  | 10.99363700 |
| N | 11.77441800 | 1.57397100  | 10.96555900 |
| C | 10.55940100 | -1.09430300 | 10.63619700 |
| H | 6.88840800  | -0.98456600 | 9.60330800  |
| C | 8.57623200  | -2.28165900 | 9.98103700  |
| H | 5.66227000  | 0.04290400  | 4.15719600  |
| C | 4.61999200  | -0.55743700 | 5.95289300  |
| H | 3.74305200  | -0.93449300 | 7.88119300  |
| H | 10.89490300 | -0.63220100 | 6.56765500  |
| C | 11.64901600 | 1.36975300  | 6.85321900  |
| H | 12.07849800 | 3.46301100  | 7.21941800  |
| H | 8.46348700  | -2.30035900 | 13.89962200 |
| C | 6.53461100  | -2.64871900 | 12.99293000 |
| H | 4.57153900  | -2.63156500 | 12.03616100 |
| C | 8.35351700  | 3.82839400  | 16.10538400 |
| H | 9.78186000  | 4.69412200  | 14.73727300 |
| H | 6.80347000  | 2.81401600  | 17.21608600 |
| C | 13.21879500 | 3.64040800  | 11.17923600 |
| H | 11.60605100 | -1.04338600 | 10.91348600 |



|    |             |             |             |
|----|-------------|-------------|-------------|
| C  | 9.91887200  | -2.29931800 | 10.36043400 |
| H  | 8.03744000  | -3.19449600 | 9.75083300  |
| H  | 4.00217000  | -1.29326500 | 5.44493300  |
| H  | 12.67544000 | 1.10463600  | 6.61447000  |
| H  | 6.58920100  | -3.72836200 | 13.10471100 |
| H  | 8.79588500  | 4.28450400  | 16.98701000 |
| C  | 14.30378700 | 2.65276400  | 11.64607900 |
| C  | 13.63358500 | 4.24990700  | 9.81867000  |
| C  | 13.03570700 | 4.74282600  | 12.24460500 |
| H  | 10.46141100 | -3.23761700 | 10.43375800 |
| H  | 14.44785700 | 1.84894300  | 10.91881200 |
| H  | 15.25136200 | 3.18871900  | 11.77013800 |
| H  | 14.03643500 | 2.19338300  | 12.60330500 |
| H  | 12.86705400 | 4.91327800  | 9.41147200  |
| H  | 14.55538300 | 4.83003100  | 9.93722100  |
| H  | 13.81783100 | 3.45458100  | 9.08788400  |
| H  | 12.76339200 | 4.30298800  | 13.21146700 |
| H  | 13.97425500 | 5.29285100  | 12.37196500 |
| H  | 12.26566900 | 5.46587900  | 11.96846700 |
| Cl | 9.98661000  | 7.10747200  | 9.29916400  |
| O  | 9.21508200  | 6.01292500  | 10.03043800 |
| O  | 9.00396400  | 8.14547900  | 9.33917700  |
| O  | 10.34291700 | 6.55209300  | 7.97122800  |
| O  | 11.22013800 | 7.49991000  | 10.03046700 |

**Table S4.** Selected bond lengths (Å) of **1-G** with (a) and without (b) NH···O interactions (Numbering of atoms as in Fig. S8).

|        | a     | b     |
|--------|-------|-------|
| Cu1–N1 | 2.321 | 2.438 |
| Cu1–P1 | 2.284 | 2.291 |
| Cu1–N4 | 2.313 | 2.079 |
| Cu1–P4 | 2.281 | 2.251 |
| Cu2–N2 | 2.216 | 2.164 |
| Cu2–P2 | 2.258 | 2.243 |
| Cu2–N3 | 2.340 | 2.236 |
| Cu2–P3 | 2.270 | 2.246 |

**Table S5.** Molecular orbital compositions (%) of **1-G** with NH···O interactions at B3LYP/6-31G(d)/SDD level (Numbering of fragments as in Fig. S8).

| Orbital | Contribution (%) |      |                   |                 |                   |                   |                 |                   |
|---------|------------------|------|-------------------|-----------------|-------------------|-------------------|-----------------|-------------------|
|         | Cu1              | Cu2  | Triz <sup>A</sup> | Py <sup>A</sup> | dppm <sup>A</sup> | Triz <sup>B</sup> | Py <sup>B</sup> | dppm <sup>B</sup> |
| LUMO    | 0.22             | 1.64 | 0.51              | 1.35            | 4.45              | 25.3              | 62.0            | 2.78              |
| HOMO    | 24.2             | 27.3 | 0.82              | 3.72            | 17.5              | 4.59              | 1.28            | 20.3              |

**Table S6.** Molecular orbital compositions (%) of **1-G** without NH···O interactions at B3LYP/6-31G(d)/SDD level (Numbering of fragments as in Fig. S8).

| Orbital | Contribution (%) |      |                   |                 |                   |                   |                 |                   |
|---------|------------------|------|-------------------|-----------------|-------------------|-------------------|-----------------|-------------------|
|         | Cu1              | Cu2  | Triz <sup>A</sup> | Py <sup>A</sup> | dppm <sup>A</sup> | Triz <sup>B</sup> | Py <sup>B</sup> | dppm <sup>B</sup> |
| LUMO    | 2.42             | 0.50 | 28.4              | 58.4            | 3.57              | 0.02              | 0.03            | 5.46              |
| HOMO    | 12.7             | 39.1 | 0.81              | 1.60            | 8.84              | 3.53              | 4.41            | 25.8              |
